# Supplementary material for: Hypoxia-inducible factor-1α regulates microglial functions affecting neuronal survival in the acute phase of ischemic stroke in mice
Source: PubMed Central journal article supplement (PMC5762339; doi:10.18632/oncotarget.22851), 2017-12-01
Supplement: oncotarget-08-111508-s001.pdf [file oncotarget-08-111508-s001.pdf]

## Hypoxia-inducible factor-1 $\alpha$ regulates microglial functions affecting neuronal survival in the acute phase of ischemic stroke in mice

### SUPPLEMENTARY MATERIALS

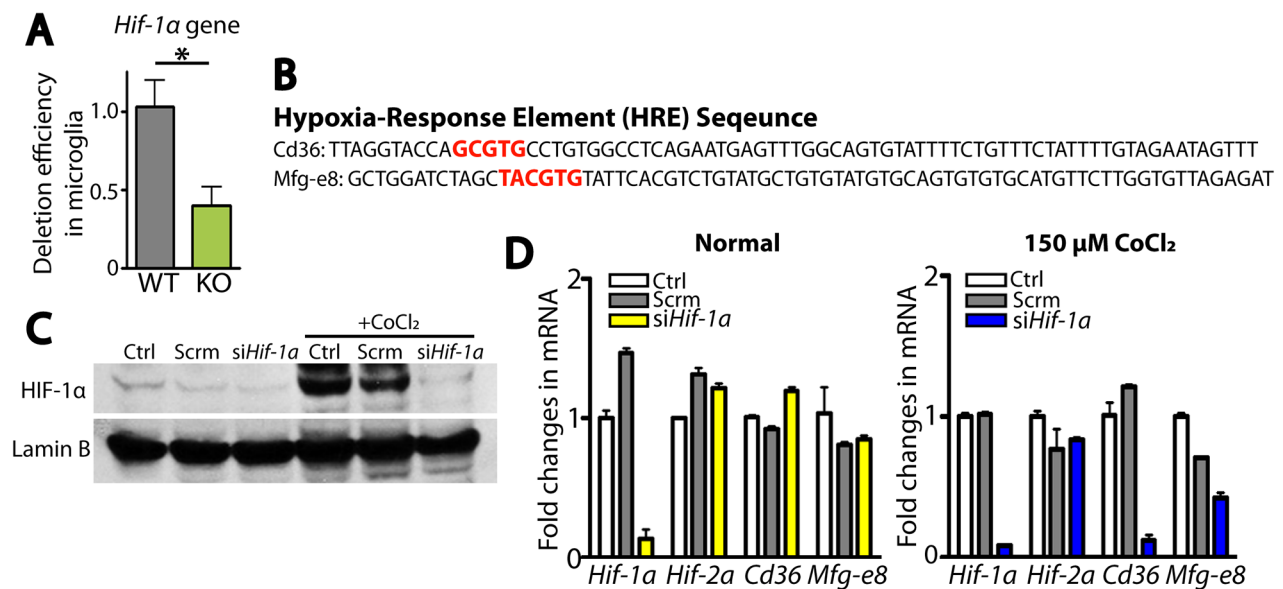

**Supplementary Figure 1:** (A) Deletion efficiency of *Hif-1 $\alpha$*  measured in isolated microglia from WT or myeloid-specific *Hif-1 $\alpha$*  KO mice at d5 post MCAO. (B) Hypoxia-responsive element (HRE) sequence, 5'-RCGTG-3' (red) in murine *Cd36* or *Mfg-e8*. (C) Immunoblot analyses against HIF-1 $\alpha$  protein in the nucleus of BV2 cells knocked down for *Hif-1 $\alpha$*  with and without CoCl<sub>2</sub>. Lamin B was used as loading control. (D) Knockdown efficacy of *Hif-1 $\alpha$* , *Cd36*, and *Mfg-e8* in BV2 cells transfected with scrambled siRNA (Scrm), *Hif-1 $\alpha$*  siRNA (*siHif-1 $\alpha$* ), or medium alone (Ctrl) for 24 hr with (right) or without (left) CoCl<sub>2</sub>.
